# Supplementary material for: Phytochrome B-mediated activation of lipoxygenase modulates an excess red light-induced defence response in Arabidopsis
Source: PubMed Central journal article supplement (PMC4144769; doi:10.1093/jxb/eru247), 2014-06-10
Supplement: supp_eru247_jexbot123117_file001.pdf [file supp_eru247_jexbot123117_file001.pdf]

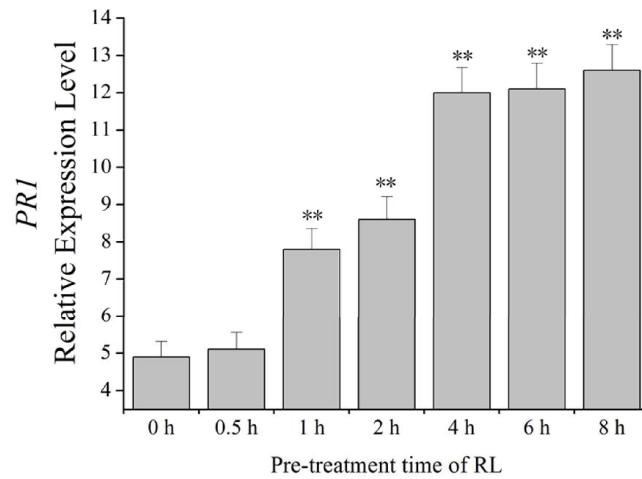

Figure S1

**Fig. S1.** Impact of different time of RL on *PRI* expression. Quantitative RT-PCR data show the expression of the *PRI* gene in WT *Arabidopsis*. Total RNA was extracted from leaves 4 h post inoculation by Pst-DC3000, plants were pre-treated with different time of RL as indicated. *Arabidopsis ACTIN2* was used as an internal control. Expression levels for each treatment were normalized to a RL-treated (0 h) plant. Values represent means  $\pm$ SD of three independent experiments. Asterisks (\*) indicate a significant difference from the (0 h) at \*  $P < 0.05$  or \*\*  $P < 0.01$  by *t*-test.

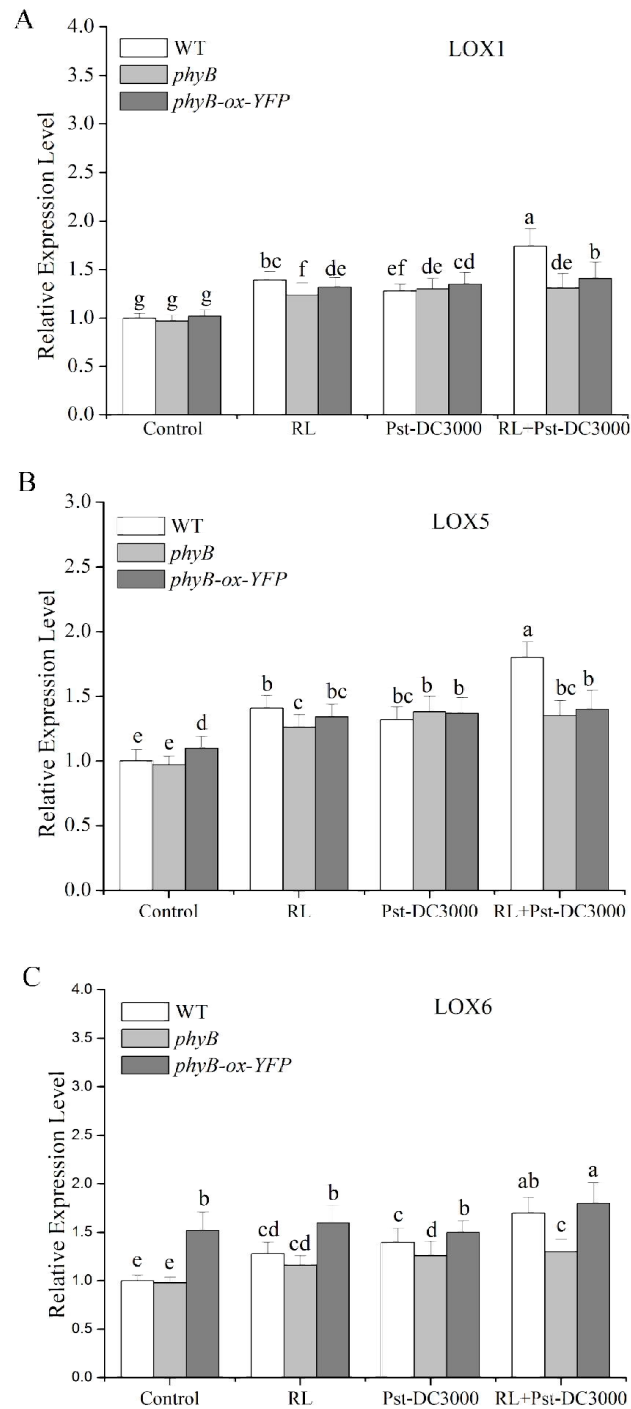

Figure S2

**Fig. S2.** Induction of transcription levels of *LOX1*, *LOX5*, *LOX6* by RL. (A)-(C) Transcript levels of *LOX1*, *LOX5*, *LOX6* in wild-type, *phyB*, *phyB-ox-YFP* plants. Total RNA were extracted from the leaves of full-grown *Arabidopsis* after different treatments as follows: control (no treatment), RL ( $120 \mu\text{mol photons m}^{-2}\text{s}^{-1}$ ; 4 h), Pst-DC3000 inoculation ( $\text{OD}_{600}=0.01$  in 10 mM  $\text{MgCl}_2$ ), RL+Pst-DC3000 (inoculation after RL). *Arabidopsis ACTIN2* was used as an internal control. Different letters indicate statistically significant

differences between treatments (Duncan's multiple range test:  $P < 0.05$ ). Values represent means  $\pm$ SD of three independent experiments.

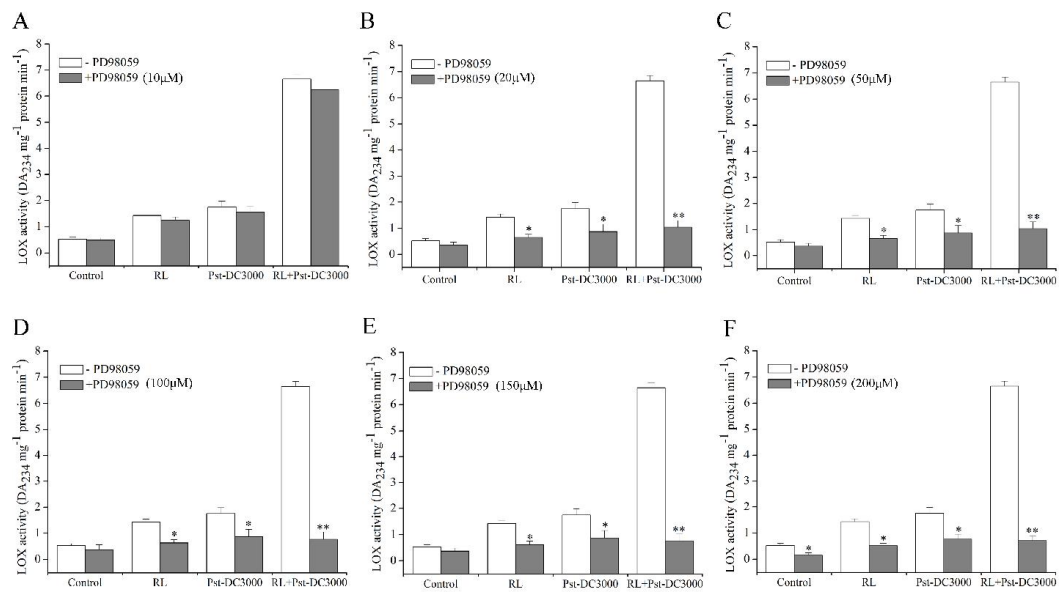

Figure S3

**Fig. 3.** Effect of different concentrations of PD98059 on activation of LOX. Leaves were pre-incubated with or without PD98059 for 1 h, and then proteins were extracted from the leaves 2 h post treatment. Concentrations of PD98059 in (A)-(F) were 10  $\mu$ M, 20  $\mu$ M, 50  $\mu$ M, 100  $\mu$ M, 150  $\mu$ M and 200  $\mu$ M.

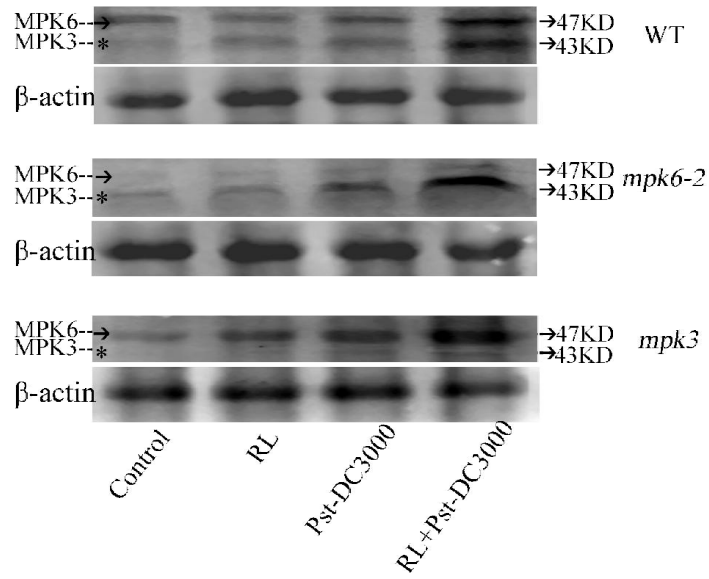

Figure S4

**Fig. S4.** Activation of MPK3 and MPK6 during defense response induced by RL in the WT, *mpk6-2* and *mpk3* plants. Proteins were extracted from the leaves treated as follows: control (no treatment), RL (120  $\mu\text{mol photons m}^{-2}\text{s}^{-1}$ ; 4 h), Pst-DC3000 inoculation ( $\text{OD}_{600}=0.01$  in 10 mM  $\text{MgCl}_2$ , 2 h), RL+Pst-DC3000 (2 h inoculation after RL). The experiment was repeated three times with similar results.

Table S1. Primers for several genes.

| Gene name | Primer                                                               |
|-----------|----------------------------------------------------------------------|
| LOX1      | U:GATAGTGAATCATACGGTAACCAGA<br>D:AGGATGAGGCAAGCTCAGCTCTAT            |
| LOX2      | U:CACCTGACGAAGAGTACATTGG<br>D:GTAACACCATGCTCAGAGGTAGG                |
| LOX3      | U:TGAACATTGAGAGAGTCAAGACTTTT<br>D:AGATAGTTCGAGTAGCATAGGCTTTGC        |
| LOX4      | U:TCGCTAACTTTGGTGAGATCGATAG<br>D:TCGTCATCTCGAAGCATGCATATT            |
| LOX5      | U:CATACGAACAGAGCACATAGAATCA<br>D:AAACTTTGCTGACCGATCCATATGA           |
| LOX6      | U:GCTTGAAATCAATGCTCGTGCG<br>D:GTCAATCACAAGCCTCACGCCAC                |
| CaM3      | U:GCTCTAGAACAGGTTTCACGAAAAGGAGA<br>D:CGGGATCCCTTAGCCATCATGACCTTAAC   |
| Actin2    | U:AGAGATTCAGATGCCCAGAAGTCTTGTTCC<br>D:AACGATTCCTGGACCTGCCTCATCATACTC |
| PR1       | U:CATACTCTGGTGGGCCTT<br>D:GACCACAAACTCCATTGCAC                       |
